# Supplementary material for: Highly selective and sensitive recognition of histidine based on the oxidase-like activity of Cu2+ions
Source: Royal Society of Chemistry journal article supplement (doi:10.1039/c5ra17900a), 2015-01-01
Supplement: c5ra17900a1.pdf [file c5ra17900a1.pdf]

## **Highly selective and sensitive recognition of histidine based on the oxidase-like activity of Cu<sup>2+</sup> ions**

Yan Xu,<sup>a</sup> Xiao-Qiong Wu,<sup>a</sup> Jiang-Shan Shen,<sup>a,b\*</sup> and Hong-Wu Zhang<sup>a\*</sup>

<sup>a</sup> Key Laboratory of Urban Pollutant Conversion, Institute of Urban Environment, Chinese Academy of Sciences, Xiamen, 361021, China.

<sup>b</sup>College of Materials Science and Engineering, Huaqiao University, Xiamen 361021, China.

E-mail: jsshenn@hqu.edu.cn; hwzhang@iue.ac.cn; Fax: +86-592-619-0773; Tel: +86-592-619-0773

### **Supporting Information**

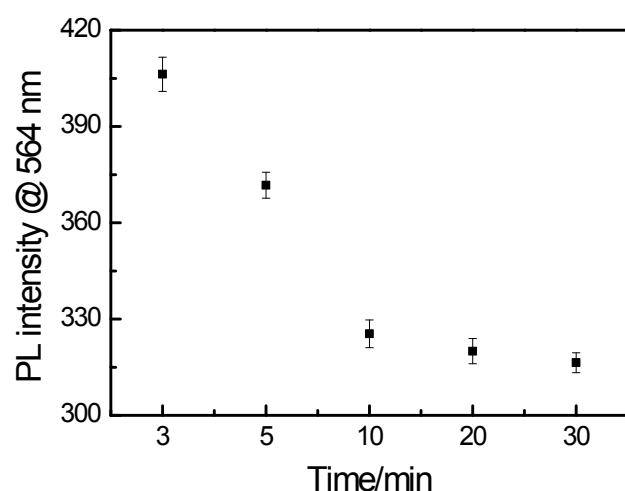

**Fig.S1** The relationship between PL intensity @564 nm and the interaction time of His towards  $\text{Cu}^{2+}$  ions.  $[\text{Cu}^{2+} \text{ ions}] = 0.5 \mu\text{M}$ ;  $[\text{His}] = 5 \mu\text{M}$ ;  $[\text{OPD}] = 0.5 \text{ mM}$ ; temperature of  $65^\circ\text{C}$ ; 50 mM Tris-HCl of pH 7.4 buffer solution containing 15% acetonitrile (by volume).

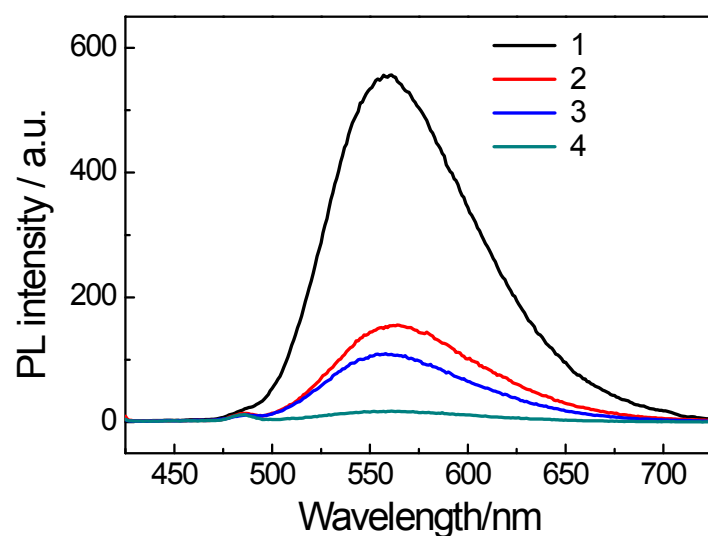

**Fig. S2** The comparisons of the OPD- $\text{Cu}^{2+}$  (1 and 2) and only OPD (3 and 4) in the presence (1 and 3) or absence (2 and 4) of dissolved oxygen. Experimental conditions:  $[\text{OPD}] = 0.5 \text{ mM}$ ; temperature of  $65^\circ\text{C}$ ; 50 mM Tris-HCl buffer solution of pH 7.4 containing 15% acetonitrile (by volume); reaction time of 1 h.  $[\text{Cu}^{2+}] = 0.5 \mu\text{M}$  for 1 and 2.  $\text{N}_2$  gas was continuously bubbled during the whole reaction process for removing dissolved oxygen.

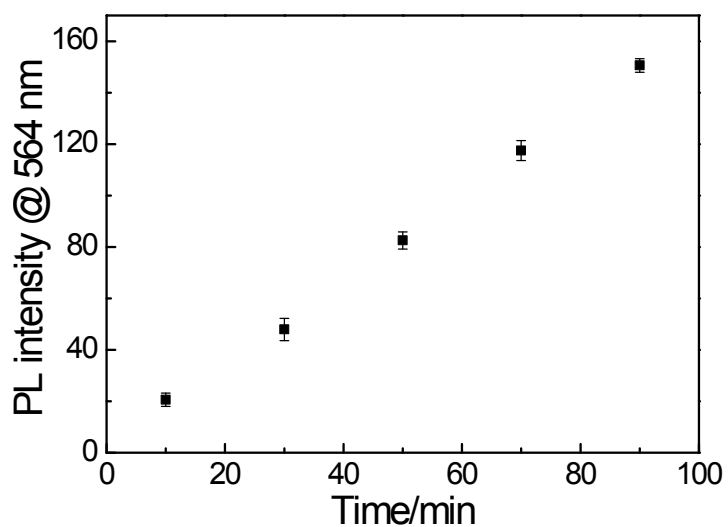

**Fig. S3** The reaction time effect on the PL intensity at 564 nm of the OPD system in the absence of  $\text{Cu}^{2+}$  ions. Experimental conditions:  $[\text{OPD}] = 0.5 \text{ mM}$ ; temperature of  $65^\circ\text{C}$ ; 50 mM Tris-HCl buffer solution of pH 7.4 containing 15% acetonitrile (by volume).

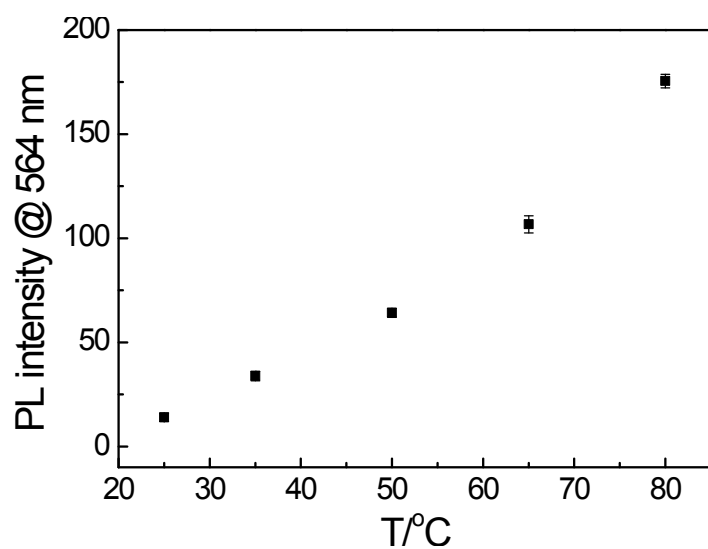

**Fig. S4** Temperature effect on the PL intensity at 564 nm of the OPD system in the absence of  $\text{Cu}^{2+}$  ions. Experimental conditions:  $[\text{OPD}] = 0.5 \text{ mM}$ ; 50 mM Tris-HCl buffer solution of pH 7.4 containing 15% acetonitrile (by volume); the reaction time of 1 h.

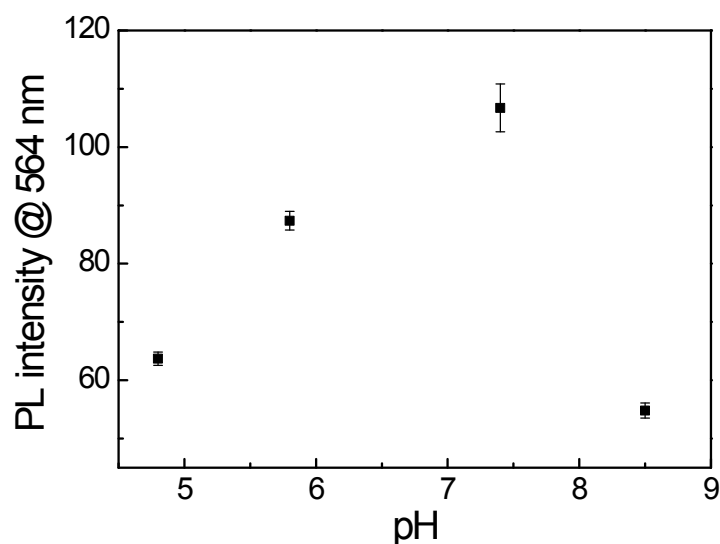

**Fig. S5** pH effect on the PL intensity at 564 nm of the OPD system in the absence of  $\text{Cu}^{2+}$  ions. Experimental conditions:  $[\text{OPD}] = 0.5 \text{ mM}$ ; temperature of  $65 \text{ }^{\circ}\text{C}$ ; the reaction time of 1 h. 200 mM NaOAc-HOAc and 50 mM Tris-HCl buffer solution were employed for controlling pH of the system.

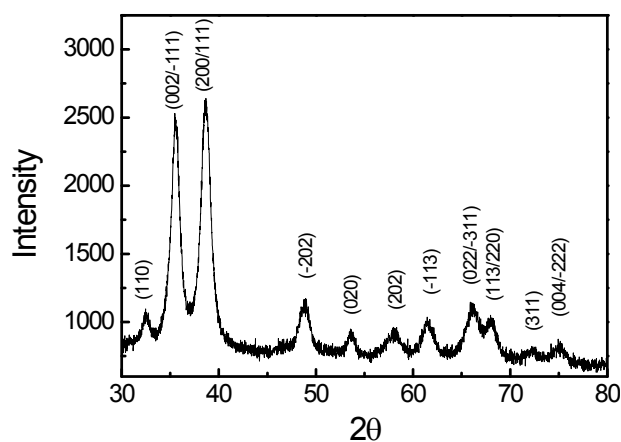

**Fig. S6** XRD of the as-prepared CuO nanoparticles.

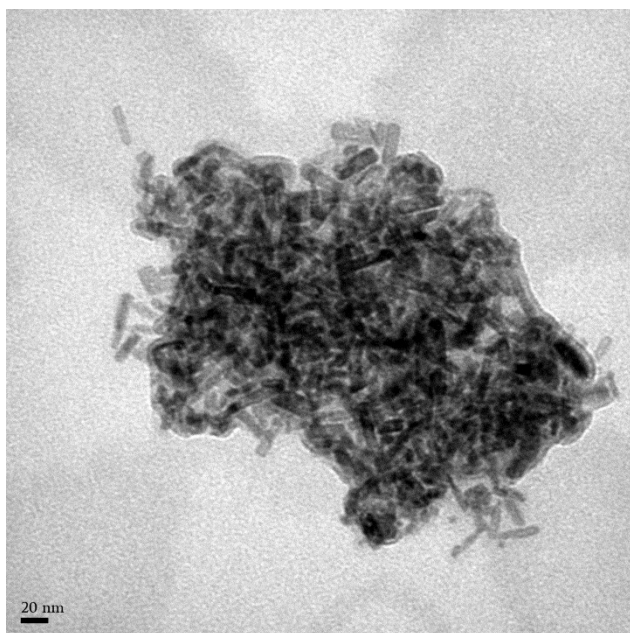

**Fig. S7** TEM image of the as-prepared CuO nanoparticles.

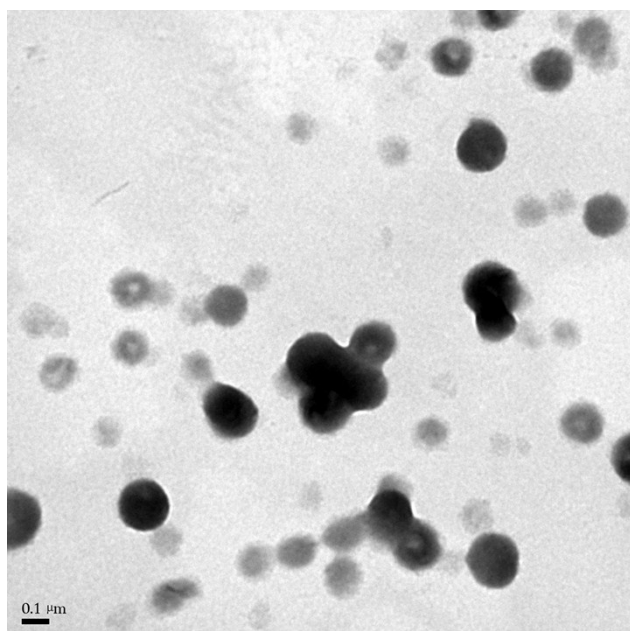

**Fig. S8** TEM image of Cu nanoparticles *in situ* formed in Cu<sup>2+</sup>- OPD system when certain amount of ascorbic acid was added.

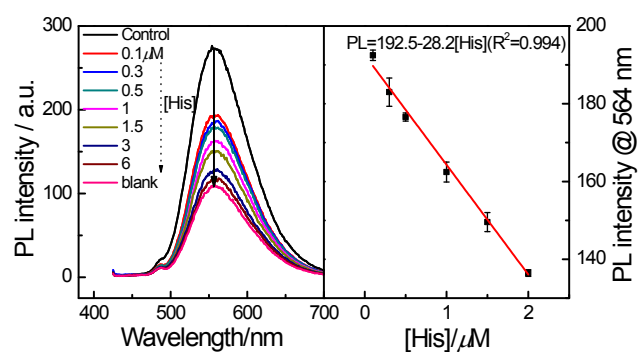

**Fig. S9** His concentration-dependent PL intensity changes at 564 nm wavelength of the  $\text{Cu}^{2+}$ -OPD system (a), and linear calibration plot between PL intensity @ 564 nm and His concentration (b). The reaction time of 1 h.  $[\text{Cu}^{2+} \text{ ions}] = 0.1 \mu\text{M}$ ;  $[\text{OPD}] = 0.5 \text{ mM}$ ; temperature of  $65^\circ\text{C}$ ; 50 mM Tris-HCl of pH 7.4 buffer solution containing 15% acetonitrile (by volume).

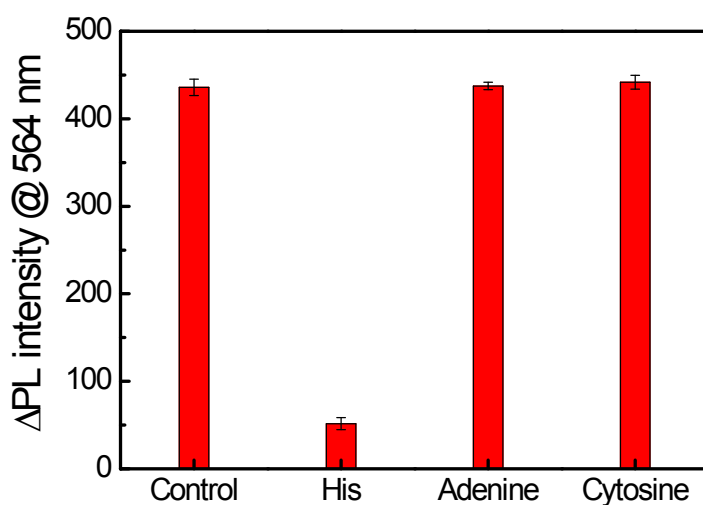

**Fig. S10** The comparison of  $\Delta\text{PL}$  intensity of the  $\text{Cu}^{2+}$ -OPD system in the presence of His, Adenine and Cytosine, respectively. The reaction time was set as 1 h. His, Adenine and Cytosine concentrations were  $15 \mu\text{M}$ ;  $[\text{Cu}^{2+}] = 0.5 \mu\text{M}$ ;  $[\text{OPD}] = 0.5 \text{ mM}$ ; temperature of  $65^\circ\text{C}$ ; 50 mM Tris-HCl buffer solution of pH 7.4 containing 15% acetonitrile (by volume). Note that,  $\Delta\text{PL}$  was obtained from that the PL intensity at 564 nm of every group subtracted that of blank (the OPD system in the absence of  $\text{Cu}^{2+}$  ions).
